# Supplementary material for: Novel “on–off” fluorescence sensing for rapid and accurate determination of Cr 3+ based on g-CNQDs
Source: Royal Society of Chemistry journal article supplement (doi:10.1039/d3ra05091b), 2023-01-01
Supplement: d3ra05091b1.pdf [file d3ra05091b1.pdf]

## Supplementary Material

### **A novel “on-off” fluorescence sensing for rapid and accurate determination of Cr<sup>3+</sup> based on g-CNQDs**

Xiaohua Xu<sup>a</sup>, Huye Li<sup>b</sup>, Yapeng Sun<sup>c</sup>, Tianfeng Ma<sup>a</sup>, Lin Shi<sup>a</sup>, Wencheng Mu<sup>a</sup>,  
Huan Wang<sup>a,\*</sup>, Yongchang Lu<sup>a,\*</sup>

a. Modern Tibetan Medicine Creation Engineering Technology Research Center of Qinghai Province, China; College of Pharmacy, Qinghai Nationalities University, Xining 810007, China. E-mail: qhmuwh1028@126.com; qhlych@126.com.

b. The Fourth People’s Hospital of Qinghai Province, Xining 810007, China. Address here.

c. *No. 2 Middle School in Xining City, Qinghai Province, Xining 810007, China.*

\* Corresponding authors.

E-mail addresses: qhmuwh1028@126.com; qhlych@126.com.

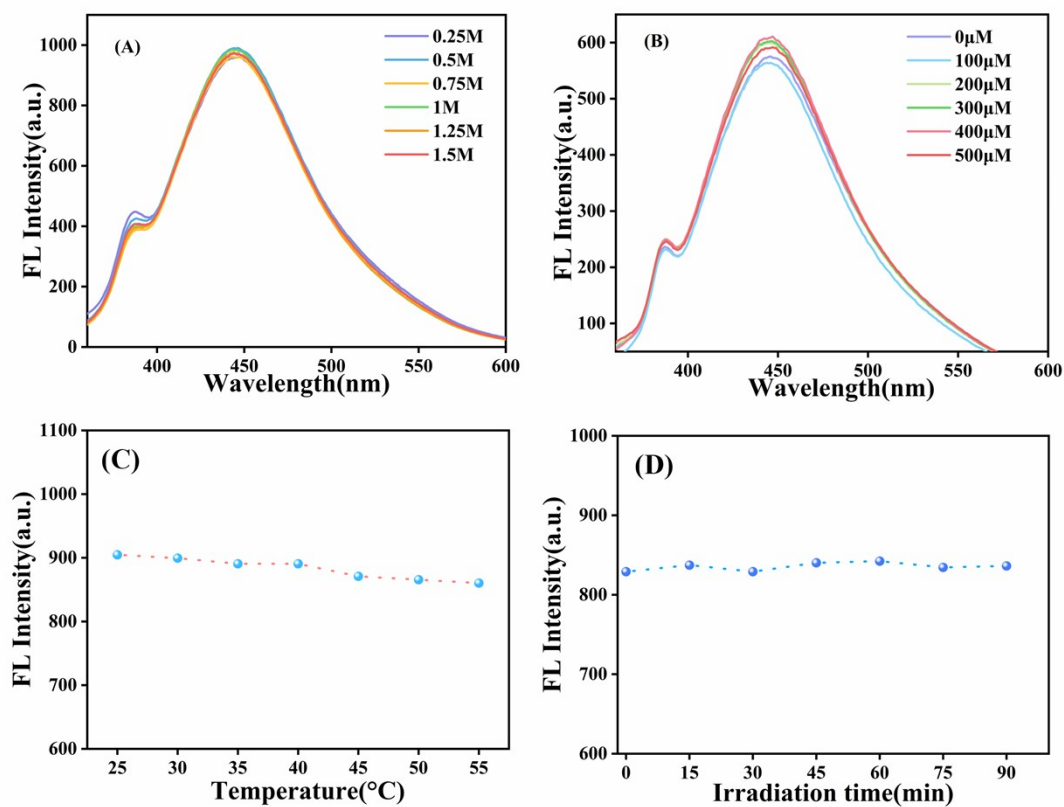

**Fig. S1.** (A) Effect of different concentrations of NaCl on the stability of g-CNQDs; (B) Effect of different H<sub>2</sub>O<sub>2</sub> concentrations on the antioxidant capacity of g-CNQDs; Effect of (C) temperature and (D) duration of UV radiation on fluorescence intensity.

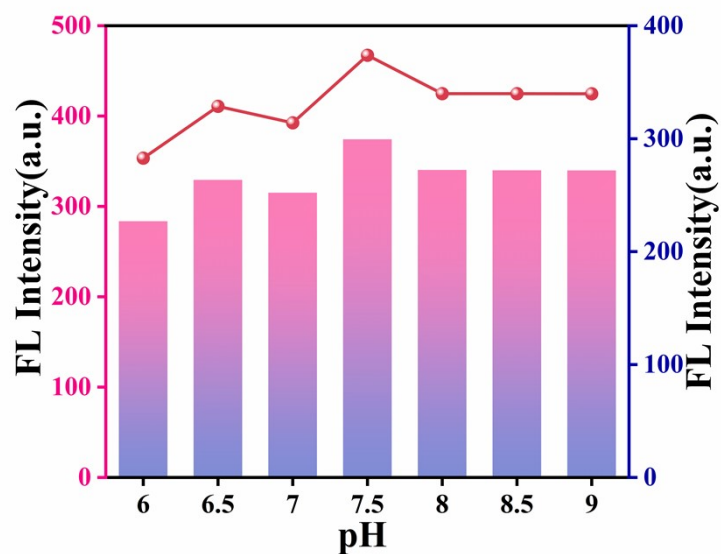

**Fig. S2.** Show the effect of different pH of PBS on the fluorescence intensity of g-

CNQDs system.

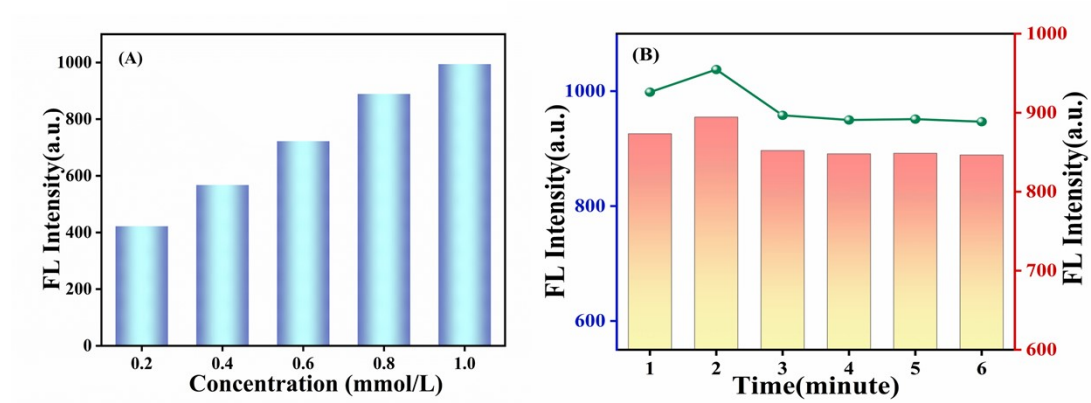

Fig. S3. (A) Effects of different concentrations of p-acetaminophen and (B) reaction time of advocated system on fluorescence intensity.

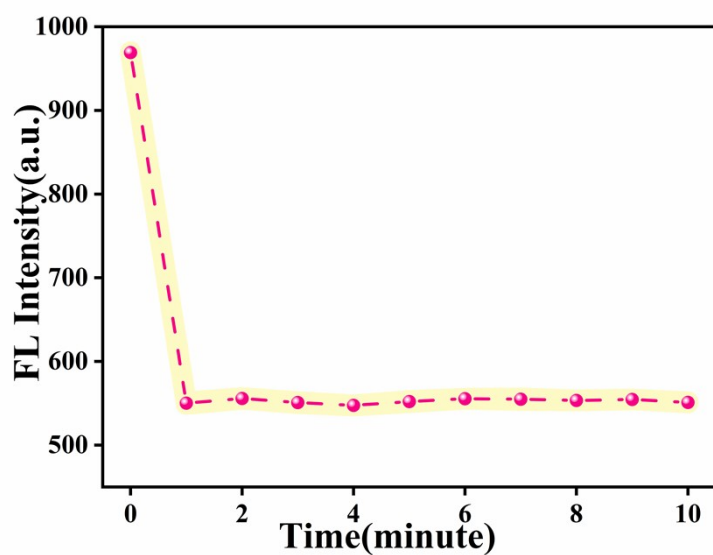

Fig. S4. Effect of incubation time with  $\text{Cr}^{3+}$  on fluorescence intensity of g-CNQDs@p-acetaminophen.

**Table S1.** Comparison of detection of Cr<sup>3+</sup> with various fluorescence probes

| Fluorescent probe                 | Line range                 | LOD                | Ref       |
|-----------------------------------|----------------------------|--------------------|-----------|
| AuNPs                             | 1~11 $\mu\text{M}$         | 0.9 $\mu\text{M}$  | 1         |
| Gold nanoparticles functionalized | 20~25 $\mu\text{M}$        | 5 $\mu\text{M}$    | 2         |
| 2D podand fluorescent probes      | –                          | 17 $\mu\text{M}$   | 3         |
| Pyridoxal conjugated AuNPs assay  | 7.5~1.3 $\times 10^{-5}$ M | 11.5 $\mu\text{M}$ | 4         |
| Rhodamine capped AuNPs assay      | –                          | 9.3 $\mu\text{M}$  | 5         |
| Fluorescence sensing              | 0.64~63.0 $\mu\text{M}$    | 0.23 $\mu\text{M}$ | This work |

## References

- [1] M. Cao, X. Ye, Y. Liu, P. Zhang and Z. Zhang, *Chem. Pap.*, 2023, 1-7.
- [2] Z. Zhang, X. Ye, Q. Liu, Y. Liu and R. Liu, *J. Anal. Sci. Technol.*, 2020, **11**, 1-7.
- [3] S. Panda, P. B. Pati and S. S. Zade, *Chem. Commun.*, 2011, **47**, 4174-4176.
- [4] S. Bothra, R. Kumar and S. K. Sahoo, *New J. Chem.*, 2017, **41**, 7339-7346.
- [5] N. Manjubaashini, T. D. Thangadurai, G. Bharathi and D. Nataraj, *J. Lumin.*, 2018, **202**, 282-288.
